# Supplementary material for: Self-reported work ability predicts health-related exit and absence from work, work participation, and death: longitudinal findings from a sample of German employees
Source: PubMed Central journal article supplement (PMC8068707; doi:10.1007/s00420-020-01608-4), 2020-11-21

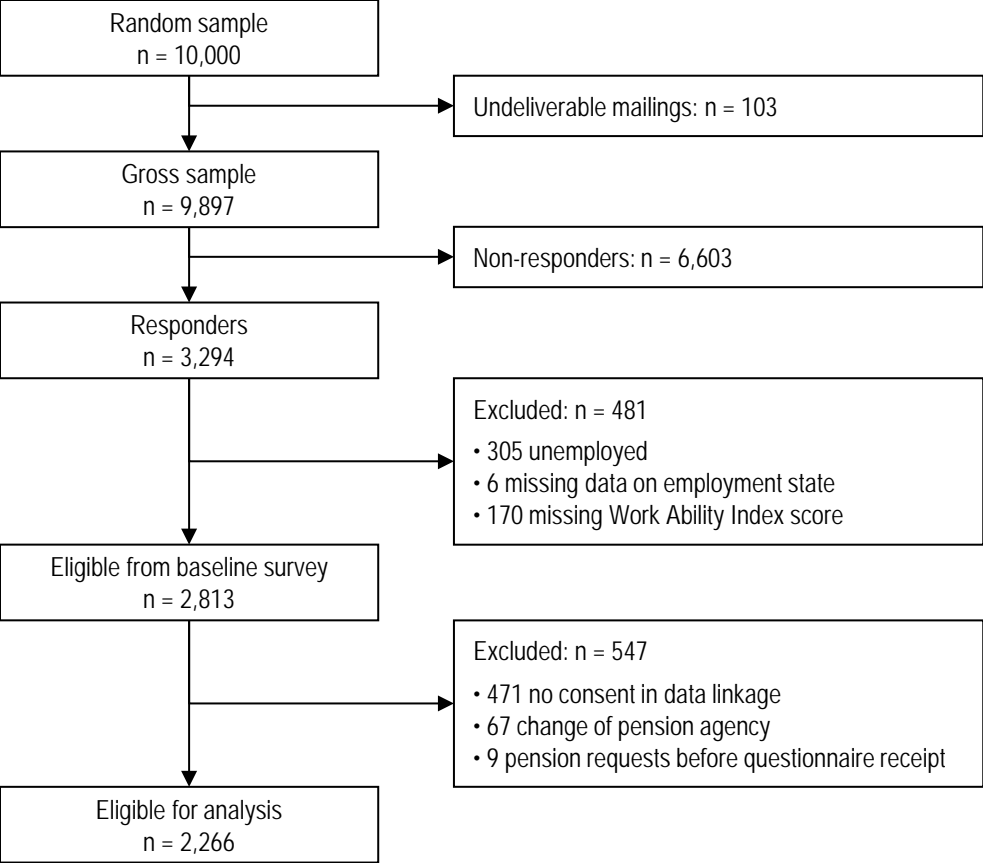

Supplement: 420_2020_1608_MOESM1_ESM.pdf [file 420_2020_1608_MOESM1_ESM.pdf]
