# Supplementary material for: Self-reported work ability predicts health-related exit and absence from work, work participation, and death: longitudinal findings from a sample of German employees
Source: PubMed Central journal article supplement (PMC8068707; doi:10.1007/s00420-020-01608-4), 2020-11-21
Supplement: 420_2020_1608_MOESM2_ESM.pdf [file 420_2020_1608_MOESM2_ESM.pdf]

**Online Resource 2** Baseline characteristics: all respondents and stratified based on levels of work ability

|             | Total<br>(n = 2,266) |      |            | Poor<br>(n = 532) |      |            | Moderate<br>(n = 865) |      |            | Good/excellent<br>(n = 869) |      |            |
|-------------|----------------------|------|------------|-------------------|------|------------|-----------------------|------|------------|-----------------------------|------|------------|
|             | n                    | %    | Mean (SD)  | n                 | %    | Mean (SD)  | n                     | %    | Mean (SD)  | n                           | %    | Mean (SD)  |
| Sex         |                      |      |            |                   |      |            |                       |      |            |                             |      |            |
| Male        | 1,033                | 45.6 |            | 241               | 45.3 |            | 387                   | 44.7 |            | 405                         | 46.6 |            |
| Female      | 1,233                | 54.4 |            | 291               | 54.7 |            | 478                   | 55.3 |            | 464                         | 53.4 |            |
| Age         | 2,266                |      | 47.9 (4.1) | 532               |      | 48.1 (4.2) | 865                   |      | 48.0 (4.1) | 869                         |      | 47.6 (4.1) |
| 40–44 years | 548                  | 24.2 |            | 127               | 23.9 |            | 198                   | 22.9 |            | 223                         | 25.7 |            |
| 45–49 years | 826                  | 36.5 |            | 176               | 33.1 |            | 315                   | 36.4 |            | 335                         | 38.6 |            |
| 50–54 years | 892                  | 39.4 |            | 229               | 43.0 |            | 352                   | 40.7 |            | 311                         | 35.8 |            |
| Education   |                      |      |            |                   |      |            |                       |      |            |                             |      |            |
| Low         | 453                  | 20.1 |            | 155               | 29.3 |            | 166                   | 19.3 |            | 132                         | 15.2 |            |
| Medium      | 1,342                | 59.4 |            | 287               | 54.3 |            | 526                   | 61.0 |            | 529                         | 60.9 |            |

|                     |       |      |  |     |      |  |     |      |  |     |      |  |
|---------------------|-------|------|--|-----|------|--|-----|------|--|-----|------|--|
| High                | 464   | 20.5 |  | 87  | 16.4 |  | 170 | 19.7 |  | 207 | 23.8 |  |
| Missing             | 7     |      |  | 3   |      |  | 3   |      |  | 1   |      |  |
| Partnership         |       |      |  |     |      |  |     |      |  |     |      |  |
| Partnered           | 1,748 | 78.8 |  | 400 | 77.1 |  | 651 | 77.0 |  | 697 | 81.5 |  |
| Single              | 471   | 21.2 |  | 119 | 22.9 |  | 194 | 23.0 |  | 158 | 18.5 |  |
| Missing             | 47    |      |  | 13  |      |  | 20  |      |  | 14  |      |  |
| Employment          |       |      |  |     |      |  |     |      |  |     |      |  |
| Full-time           | 698   | 31.1 |  | 183 | 34.8 |  | 270 | 31.5 |  | 245 | 28.5 |  |
| Part-time           | 1,546 | 68.9 |  | 343 | 65.2 |  | 588 | 68.5 |  | 615 | 71.5 |  |
| Missing             | 22    |      |  | 6   |      |  | 7   |      |  | 9   |      |  |
| Job demands         |       |      |  |     |      |  |     |      |  |     |      |  |
| Mental              | 1,097 | 48.4 |  | 239 | 44.9 |  | 416 | 48.1 |  | 442 | 50.9 |  |
| Mental and physical | 966   | 42.6 |  | 230 | 43.2 |  | 371 | 42.9 |  | 365 | 42.0 |  |
| Physical            | 203   | 9.0  |  | 63  | 11.8 |  | 78  | 9.0  |  | 62  | 7.1  |  |

|                    |       |      |  |     |      |  |     |      |  |     |      |  |
|--------------------|-------|------|--|-----|------|--|-----|------|--|-----|------|--|
| Job position       |       |      |  |     |      |  |     |      |  |     |      |  |
| Blue collar        | 204   | 9.1  |  | 54  | 10.2 |  | 82  | 9.5  |  | 68  | 7.9  |  |
| White collar       | 2,047 | 90.9 |  | 473 | 89.8 |  | 777 | 90.5 |  | 797 | 92.1 |  |
| Missing            | 15    |      |  | 5   |      |  | 6   |      |  | 4   |      |  |
| Size of enterprise |       |      |  |     |      |  |     |      |  |     |      |  |
| < 50 employees     | 698   | 31.2 |  | 173 | 32.8 |  | 244 | 28.6 |  | 281 | 32.9 |  |
| 50-249 employees   | 496   | 22.2 |  | 120 | 22.8 |  | 185 | 21.7 |  | 191 | 22.4 |  |
| ≥ 250 employees    | 1,041 | 46.6 |  | 234 | 44.4 |  | 425 | 49.8 |  | 382 | 44.7 |  |
| Missing            | 31    |      |  | 5   |      |  | 11  |      |  | 15  |      |  |
| Smoking            |       |      |  |     |      |  |     |      |  |     |      |  |
| Never smoker       | 896   | 39.6 |  | 188 | 35.4 |  | 345 | 39.9 |  | 363 | 42.0 |  |
| Current smoker     | 649   | 28.7 |  | 177 | 33.3 |  | 239 | 27.7 |  | 233 | 26.9 |  |
| Former smoker      | 715   | 31.6 |  | 166 | 31.3 |  | 280 | 32.4 |  | 269 | 31.1 |  |
| Missing            | 6     |      |  | 1   |      |  | 1   |      |  | 4   |      |  |

|                                                            |       |      |             |     |      |              |     |      |             |     |      |             |
|------------------------------------------------------------|-------|------|-------------|-----|------|--------------|-----|------|-------------|-----|------|-------------|
| Body mass index                                            |       |      |             |     |      |              |     |      |             |     |      |             |
| < 30                                                       | 1,746 | 77.5 |             | 380 | 71.7 |              | 645 | 75.1 |             | 721 | 83.5 |             |
| ≥ 30                                                       | 506   | 22.5 |             | 150 | 28.3 |              | 214 | 24.9 |             | 142 | 16.5 |             |
| Missing                                                    | 14    |      |             | 2   |      |              | 6   |      |             | 6   |      |             |
| Sports activity                                            |       |      |             |     |      |              |     |      |             |     |      |             |
| < 2 hours                                                  | 848   | 37.5 |             | 151 | 28.6 |              | 295 | 34.1 |             | 402 | 46.4 |             |
| ≥ 2 hours                                                  | 1,411 | 62.5 |             | 377 | 71.4 |              | 569 | 65.9 |             | 465 | 53.6 |             |
| Missing                                                    | 7     |      |             | 4   |      |              | 1   |      |             | 2   |      |             |
| Days with sickness<br>absence benefits in<br>2011 and 2012 | 2,266 |      | 84.3 (83.1) | 532 |      | 112.9 (99.4) | 865 |      | 87.0 (84.1) | 869 |      | 64.1 (63.4) |
| Days with<br>unemployment<br>benefits in 2011 and          | 2,266 |      | 8.9 (39.1)  | 532 |      | 4.7 (30.0)   | 865 |      | 7.9 (34.9)  | 869 |      | 12.4 (46.9) |

|                                                        |       |  |                    |     |  |                    |     |  |                    |     |  |                    |
|--------------------------------------------------------|-------|--|--------------------|-----|--|--------------------|-----|--|--------------------|-----|--|--------------------|
| 2012                                                   |       |  |                    |     |  |                    |     |  |                    |     |  |                    |
| Days in employment<br>in 2011 and 2012                 | 2,266 |  | 631.5 (139.2)      | 532 |  | 610.4 (144.7)      | 865 |  | 632.3 (135.4)      | 869 |  | 643.5 (138.1)      |
| Income from<br>employment in euros<br>in 2011 and 2012 | 2,266 |  | 60,669<br>(31,581) | 532 |  | 56,293<br>(28,586) | 865 |  | 61,184<br>(31,010) | 869 |  | 62,835<br>(33,596) |

SD = standard deviation
